# Supplementary material
Source: PubMed Central journal article supplement (PMC2048801)
Supplement: plntphys_pp.107.103176_1.pdf [file plntphys_pp.107.103176_1.pdf]

**Table S1.** Cytokinins in *Physcomitrella* tissue given in pmol/g dry weight. Mean values  $\pm$  standard deviations from 3 cultures per genotype are presented. Data correspond to Fig. 3A. u.d.l. – under detection limit

| genotype  | day | iPRMP          | iPR            | iP             | iP9G   | DHZRMP | DHZR            | DHZROG        | DHZ             | DHZOG  | BARP   | BAR             | BA             | BA9G   | mT            | oT            |
|-----------|-----|----------------|----------------|----------------|--------|--------|-----------------|---------------|-----------------|--------|--------|-----------------|----------------|--------|---------------|---------------|
| wild type | d0  | 331.8 $\pm$ 36 | 30.8 $\pm$ 2.9 | 10.9 $\pm$ 2.4 | u.d.l. | u.d.l. | 0.07 $\pm$ 0.04 | 4.5 $\pm$ 1.5 | 0.38 $\pm$ 0.04 | u.d.l. | u.d.l. | 0.53 $\pm$ 0.10 | 6.1 $\pm$ 0.80 | u.d.l. | 7.9 $\pm$ 2.6 | 6.2 $\pm$ 2.5 |
|           | d10 | 159.9 $\pm$ 6  | 8.9 $\pm$ 0.8  | 5.0 $\pm$ 0.6  | u.d.l. | u.d.l. | 0.10 $\pm$ 0.03 | 2.6 $\pm$ 0.4 | 0.08 $\pm$ 0.03 | u.d.l. | u.d.l. | 0.48 $\pm$ 0.14 | 3.1 $\pm$ 1.5  | u.d.l. | 0.9 $\pm$ 0.2 | 0.9 $\pm$ 0.2 |
|           | d20 | 63.0 $\pm$ 22  | 2.7 $\pm$ 0.9  | 3.2 $\pm$ 0.5  | u.d.l. | u.d.l. | 0.07 $\pm$ 0.02 | 2.2 $\pm$ 0.6 | 0.05 $\pm$ 0.02 | u.d.l. | u.d.l. | 0.41 $\pm$ 0.18 | 4.2 $\pm$ 0.3  | u.d.l. | 1.8 $\pm$ 0.4 | 0.9 $\pm$ 0.2 |
| tCKX7     | d0  | 329.5 $\pm$ 41 | 62.1 $\pm$ 3.5 | 9.5 $\pm$ 2.4  | u.d.l. | u.d.l. | 0.09 $\pm$ 0.04 | 4.4 $\pm$ 0.9 | 0.32 $\pm$ 0.08 | u.d.l. | u.d.l. | 1.47 $\pm$ 0.62 | 6.2 $\pm$ 2.8  | u.d.l. | 5.4 $\pm$ 0.9 | 6.0 $\pm$ 2.5 |
|           | d10 | 154.4 $\pm$ 39 | 16.1 $\pm$ 4.7 | 2.2 $\pm$ 0.3  | u.d.l. | u.d.l. | 0.09 $\pm$ 0.02 | 3.1 $\pm$ 0.3 | 0.06 $\pm$ 0.02 | u.d.l. | u.d.l. | 0.25 $\pm$ 0.04 | 2.2 $\pm$ 0.4  | u.d.l. | 1.2 $\pm$ 0.1 | 0.7 $\pm$ 0.1 |
|           | d20 | 127.1 $\pm$ 40 | 8.3 $\pm$ 2.8  | 2.3 $\pm$ 0.3  | u.d.l. | u.d.l. | 0.05 $\pm$ 0.01 | 0.1 $\pm$ 0.0 | 0 $\pm$ 0       | 2.1    | u.d.l. | 0.85 $\pm$ 0.34 | 3.1 $\pm$ 0.3  | u.d.l. | 2.0 $\pm$ 0.3 | 0.8 $\pm$ 0.1 |
| tCKX16    | d0  | 280.6 $\pm$ 82 | 35.8 $\pm$ 4.1 | 7.1 $\pm$ 2.9  | u.d.l. | u.d.l. | 0.16 $\pm$ 0.03 | 2.9 $\pm$ 0.5 | 0.26 $\pm$ 0.01 | u.d.l. | u.d.l. | 0.63 $\pm$ 0.14 | 5.2 $\pm$ 1.5  | u.d.l. | 3.2 $\pm$ 0.2 | 3.0 $\pm$ 0.2 |
|           | d10 | 107.9 $\pm$ 30 | 19.7 $\pm$ 7.5 | 2.6 $\pm$ 0.9  | u.d.l. | u.d.l. | 0.12 $\pm$ 0.03 | 2.5 $\pm$ 0.4 | 0.08 $\pm$ 0.02 | u.d.l. | u.d.l. | 0.18 $\pm$ 0.04 | 2.2 $\pm$ 0.3  | u.d.l. | 1.8 $\pm$ 0.8 | 1.1 $\pm$ 0.4 |
|           | d20 | 52.3 $\pm$ 17  | 2.1 $\pm$ 0.7  | 1.6 $\pm$ 0.4  | u.d.l. | u.d.l. | 0.16 $\pm$ 0.01 | 1.8 $\pm$ 0.5 | 0.07 $\pm$ 0.01 | u.d.l. | u.d.l. | 0.71 $\pm$ 0.09 | 3.8 $\pm$ 1.8  | u.d.l. | 0 $\pm$ 0     | 0.8 $\pm$ 0.1 |

| genotype  | day | tZRMP           | tZR            | tZROG            | tZ             | tZOG           | cZRMP           | cZR            | cZROG             | cZ            | cZOG            |
|-----------|-----|-----------------|----------------|------------------|----------------|----------------|-----------------|----------------|-------------------|---------------|-----------------|
| wild type | d0  | 68.1 $\pm$ 12.5 | 0.91 $\pm$ 0.2 | 170.4 $\pm$ 51.3 | 13.5 $\pm$ 1.3 | 14.8 $\pm$ 4.8 | 71.7 $\pm$ 12.7 | 13.5 $\pm$ 2.3 | 645.5 $\pm$ 207.3 | 2.7 $\pm$ 0.3 | 51.5 $\pm$ 15.4 |
|           | d10 | 11.1 $\pm$ 3.0  | 0.44 $\pm$ 0.1 | 100.8 $\pm$ 14.9 | 4.4 $\pm$ 1.2  | 5.5 $\pm$ 1.7  | 27.5 $\pm$ 10.9 | 14.2 $\pm$ 1.2 | 338.4 $\pm$ 36.1  | 2.1 $\pm$ 1.0 | 33.0 $\pm$ 12.1 |
|           | d20 | 4.6 $\pm$ 1.3   | 0.23 $\pm$ 0.0 | 83.7 $\pm$ 15.4  | 19.3 $\pm$ 6.4 | 4.9 $\pm$ 0.8  | 20.2 $\pm$ 7.8  | 14.1 $\pm$ 0.9 | 319.2 $\pm$ 65.8  | 1.0 $\pm$ 0.2 | 26.9 $\pm$ 2.7  |
| tCKX7     | d0  | 53.8 $\pm$ 15.0 | 0.55 $\pm$ 0.2 | 109.2 $\pm$ 20.7 | 8.5 $\pm$ 1.9  | 7.6 $\pm$ 1.2  | 54.2 $\pm$ 16.8 | 14.5 $\pm$ 2.0 | 626.8 $\pm$ 137.3 | 2.0 $\pm$ 0.1 | 41.2 $\pm$ 7.4  |
|           | d10 | 13.3 $\pm$ 5.4  | 0.31 $\pm$ 0.1 | 85.0 $\pm$ 11.0  | 1.2 $\pm$ 0.5  | 3.6 $\pm$ 1.0  | 33.0 $\pm$ 12.6 | 18.3 $\pm$ 1.9 | 457.0 $\pm$ 30.9  | 1.3 $\pm$ 0.3 | 43.4 $\pm$ 9.2  |
|           | d20 | 3.3 $\pm$ 0.2   | 0.29 $\pm$ 0.1 | 64.5 $\pm$ 13.8  | 16.2 $\pm$ 7.5 | 4.4 $\pm$ 1.0  | 5.2 $\pm$ 1.3   | 19.6 $\pm$ 4.1 | 312.6 $\pm$ 40.1  | 1.0 $\pm$ 0.3 | 11.2 $\pm$ 2.0  |
| tCKX16    | d0  | 43.7 $\pm$ 16.9 | 0.28 $\pm$ 0.0 | 55.3 $\pm$ 16.0  | 3.8 $\pm$ 1.2  | 5.6 $\pm$ 1.8  | 40.6 $\pm$ 11.5 | 20.9 $\pm$ 5.5 | 439.8 $\pm$ 88.1  | 2.4 $\pm$ 0.3 | 38.6 $\pm$ 11.1 |
|           | d10 | 7.9 $\pm$ 3.5   | 0.40 $\pm$ 0.1 | 49.6 $\pm$ 11.5  | 0.7 $\pm$ 0.2  | 2.7 $\pm$ 0.9  | 22.6 $\pm$ 9.8  | 27.9 $\pm$ 2.0 | 359.1 $\pm$ 46.3  | 1.9 $\pm$ 0.5 | 34.5 $\pm$ 9.3  |
|           | d20 | 4.5 $\pm$ 1.5   | 0.35 $\pm$ 0.1 | 29.3 $\pm$ 7.8   | 5.8 $\pm$ 0.7  | 2.3 $\pm$ 0.3  | 24.8 $\pm$ 6.4  | 25.3 $\pm$ 5.9 | 264.0 $\pm$ 53.9  | 1.2 $\pm$ 0.3 | 8.5 $\pm$ 2.4   |

tissue dry weight in mg per 200 ml medium

| day | wildtype        | tCKX7           | tCKX16           |
|-----|-----------------|-----------------|------------------|
| d0  | 25.2 $\pm$ 5.8  | 34.8 $\pm$ 1.7  | 31.6 $\pm$ 0.7   |
| d10 | 86.1 $\pm$ 3.8  | 96.2 $\pm$ 7.2  | 91.6 $\pm$ 14.4  |
| d20 | 189.2 $\pm$ 6.4 | 198.8 $\pm$ 2.7 | 192.0 $\pm$ 14.9 |
