# Supplementary material
Source: PubMed Central journal article supplement (PMC2048801)
Supplement: plntphys_pp.107.103176_2.pdf [file plntphys_pp.107.103176_2.pdf]

**Table S2.** Cytokinins in *Physcomitrella* culture medium given in pmol/ 100 ml. Mean values  $\pm$  standard deviations from 3 cultures per genotype are presented. Data correspond to Fig. 3B.

| genotype | day | iPRMP                  | iPR                    | iP                     | iP9G   | DHZRMP | DHZR   | DHZROG | DHZ    | DHZOG  | BARMP  | BAR    | BA     | BA9G   | mT     | oT           |
|----------|-----|------------------------|------------------------|------------------------|--------|--------|--------|--------|--------|--------|--------|--------|--------|--------|--------|--------------|
| wildtype | d0  | <b>0.1</b> $\pm$ 0.01  | <b>0.01</b> $\pm$ 0.00 | <b>0.5</b> $\pm$ 0.08  | u.d.l. | <b>0.047</b> |
|          | d10 | <b>10.4</b> $\pm$ 1.00 | <b>3.34</b> $\pm$ 0.34 | <b>10.6</b> $\pm$ 3.08 | u.d.l.       |
|          | d20 | <b>16.0</b> $\pm$ 2.14 | <b>3.30</b> $\pm$ 0.03 | <b>3.8</b> $\pm$ 0.67  | u.d.l.       |
| tCKX7    | d0  | <b>0.1</b> $\pm$ 0.05  | <b>0.04</b> $\pm$ 0.01 | <b>3.3</b> $\pm$ 0.62  | u.d.l. | <b>0.115</b> |
|          | d10 | <b>7.8</b> $\pm$ 2.86  | <b>0.17</b> $\pm$ 0.08 | <b>0.2</b> $\pm$ 0.06  | u.d.l.       |
|          | d20 | <b>11.7</b> $\pm$ 1.65 | <b>0.17</b> $\pm$ 0.08 | <b>0.1</b> $\pm$ 0.03  | u.d.l.       |
| tCKX16   | d0  | <b>0.06</b> $\pm$ 0.02 | <b>0.01</b> $\pm$ 0.00 | <b>0.06</b> $\pm$ 0.02 | u.d.l. | <b>0.048</b> |
|          | d10 | <b>5.2</b> $\pm$ 1.84  | <b>0.34</b> $\pm$ 0.16 | <b>0.3</b> $\pm$ 0.15  | u.d.l.       |
|          | d20 | <b>7.9</b> $\pm$ 2.84  | <b>0.38</b> $\pm$ 0.17 | <b>0.3</b> $\pm$ 0.12  | u.d.l.       |

| genotype | day | tZRMP                    | tZR                      | tZROG                    | tZ                       | tZOG                     | cZRMP                    | cZR                      | cZROG                    | cZ                       | cZOG                     |
|----------|-----|--------------------------|--------------------------|--------------------------|--------------------------|--------------------------|--------------------------|--------------------------|--------------------------|--------------------------|--------------------------|
| wildtype | d0  | u.d.l.                   | u.d.l.                   | u.d.l.                   | <b>0.077</b> $\pm$ 0.011 | <b>0.024</b> $\pm$ 0.005 | <b>0.135</b> $\pm$ 0.040 | <b>0.012</b> $\pm$ 0.003 | <b>0.006</b> $\pm$ 0.001 | <b>0.075</b> $\pm$ 0.024 | <b>0.032</b> $\pm$ 0.015 |
|          | d10 | <b>0.023</b> $\pm$ 0.011 | <b>0.036</b> $\pm$ 0.012 | <b>0.008</b> $\pm$ 0.001 | <b>0.202</b> $\pm$ 0.051 | <b>0.786</b> $\pm$ 0.169 | <b>0.164</b> $\pm$ 0.046 | <b>0.080</b> $\pm$ 0.014 | <b>0.035</b> $\pm$ 0.005 | <b>0.150</b> $\pm$ 0.036 | <b>0.052</b> $\pm$ 0.018 |
|          | d20 | <b>0.034</b> $\pm$ 0.009 | <b>0.031</b> $\pm$ 0.005 | <b>0.020</b> $\pm$ 0.002 | <b>0.197</b> $\pm$ 0.097 | <b>0.608</b> $\pm$ 0.247 | <b>0.146</b> $\pm$ 0.020 | <b>0.196</b> $\pm$ 0.028 | <b>0.089</b> $\pm$ 0.033 | <b>0.490</b> $\pm$ 0.095 | <b>0.139</b> $\pm$ 0.053 |
| tCKX7    | d0  | u.d.l.                   | u.d.l.                   | u.d.l.                   | <b>0.231</b> $\pm$ 0.017 | <b>0.057</b> $\pm$ 0.005 | <b>0.053</b> $\pm$ 0.021 | <b>0.039</b> $\pm$ 0.019 | <b>0.017</b> $\pm$ 0.002 | <b>0.361</b> $\pm$ 0.039 | <b>0.077</b> $\pm$ 0.016 |
|          | d10 | u.d.l.                   | <b>0.019</b> $\pm$ 0.002 | <b>0.013</b> $\pm$ 0.000 | <b>0.098</b> $\pm$ 0.012 | <b>0.512</b> $\pm$ 0.086 | <b>0.150</b> $\pm$ 0.069 | <b>0.112</b> $\pm$ 0.022 | <b>0.074</b> $\pm$ 0.022 | <b>0.025</b> $\pm$ 0.006 | <b>0.018</b> $\pm$ 0.008 |
|          | d20 | <b>0.038</b> $\pm$ 0.004 | <b>0.020</b> $\pm$ 0.005 | <b>0.051</b> $\pm$ 0.009 | <b>0.145</b> $\pm$ 0.068 | <b>0.535</b> $\pm$ 0.206 | <b>0.250</b> $\pm$ 0.100 | <b>0.576</b> $\pm$ 0.212 | <b>0.315</b> $\pm$ 0.075 | <b>0.036</b> $\pm$ 0.006 | <b>0.037</b> $\pm$ 0.004 |
| tCKX16   | d0  | u.d.l.                   | <b>0.008</b> $\pm$ 0.002 | u.d.l.                   | <b>0.138</b> $\pm$ 0.034 | <b>0.039</b> $\pm$ 0.008 | <b>0.042</b> $\pm$ 0.004 | <b>0.008</b> $\pm$ 0.003 | <b>0.008</b> $\pm$ 0.000 | <b>0.016</b> $\pm$ 0.007 | <b>0.009</b> $\pm$ 0.002 |
|          | d10 | u.d.l.                   | <b>0.015</b> $\pm$ 0.002 | <b>0.033</b> $\pm$ 0.008 | <b>0.108</b> $\pm$ 0.040 | <b>0.745</b> $\pm$ 0.267 | <b>0.237</b> $\pm$ 0.079 | <b>0.291</b> $\pm$ 0.102 | <b>0.251</b> $\pm$ 0.017 | <b>0.107</b> $\pm$ 0.040 | <b>0.034</b> $\pm$ 0.009 |
|          | d20 | u.d.l.                   | <b>0.022</b> $\pm$ 0.010 | <b>0.069</b> $\pm$ 0.020 | <b>0.130</b> $\pm$ 0.062 | <b>0.429</b> $\pm$ 0.199 | <b>2.712</b> $\pm$ 1.006 | <b>1.532</b> $\pm$ 0.755 | <b>1.397</b> $\pm$ 0.661 | <b>0.275</b> $\pm$ 0.074 | <b>0.206</b> $\pm$ 0.091 |
