# Supplementary material
Source: PubMed Central journal article supplement (PMC2048801)
Supplement: plntphys_pp.107.103176_3.pdf [file plntphys_pp.107.103176_3.pdf]

**Table S3.** Distribution of intra- and extra-cellular cytokinin bases, ribosides, nucleotides (monophosphates) and O-glucosides (zeatin) in *Physcomitrella patens* calculated as pmoles produced per 200 mL of liquid culture. Data derived from analysis presented in Fig. 3 A and B.

| tissue<br>[pmol/200 mL liquid culture] |       |           |             |              | day | medium<br>[pmol/200 mL liquid culture] |           |             |              |
|----------------------------------------|-------|-----------|-------------|--------------|-----|----------------------------------------|-----------|-------------|--------------|
|                                        | bases | ribosides | nucleotides | O-glucosides |     | bases                                  | ribosides | nucleotides | O-glucosides |
| WT                                     | 1.2   | 1.2       | 11.9        | <b>22.2</b>  | 0   | 1.3                                    | 0.0       | <b>0.5</b>  | 0.1          |
|                                        | 1.4   | 2.1       | 17.1        | <b>41.1</b>  | 10  | 22.0                                   | 6.9       | <b>21.2</b> | 1.8          |
|                                        | 3.1   | 1.8       | 9.0         | <b>44.5</b>  | 20  | 9.1                                    | 7.1       | <b>32.3</b> | 1.7          |
| tCKX7                                  | 1.3   | 2.7       | 15.2        | <b>27.3</b>  | 0   | 7.8                                    | 0.2       | <b>0.4</b>  | 0.3          |
|                                        | 0.9   | 3.4       | 19.3        | <b>56.7</b>  | 10  | 0.6                                    | 0.6       | <b>15.9</b> | 1.2          |
|                                        | 2.9   | 2.5       | 13.6        | <b>39.5</b>  | 20  | 0.7                                    | 1.5       | <b>24.0</b> | 1.9          |
| tCKX16                                 | 0.8   | 1.8       | 11.5        | <b>17.0</b>  | 0   | 0.4                                    | 0.1       | <b>0.2</b>  | 0.1          |
|                                        | 1.0   | 4.4       | 12.7        | <b>40.8</b>  | 10  | 1.1                                    | 1.3       | <b>10.8</b> | 2.1          |
|                                        | 1.3   | 2.9       | 8.2         | <b>30.6</b>  | 20  | 1.4                                    | 3.9       | <b>21.2</b> | 4.2          |
