# Supplementary material
Source: PubMed Central journal article supplement (PMC2048801)
Supplement: plntphys_pp.107.103176_5.pdf [file plntphys_pp.107.103176_5.pdf]

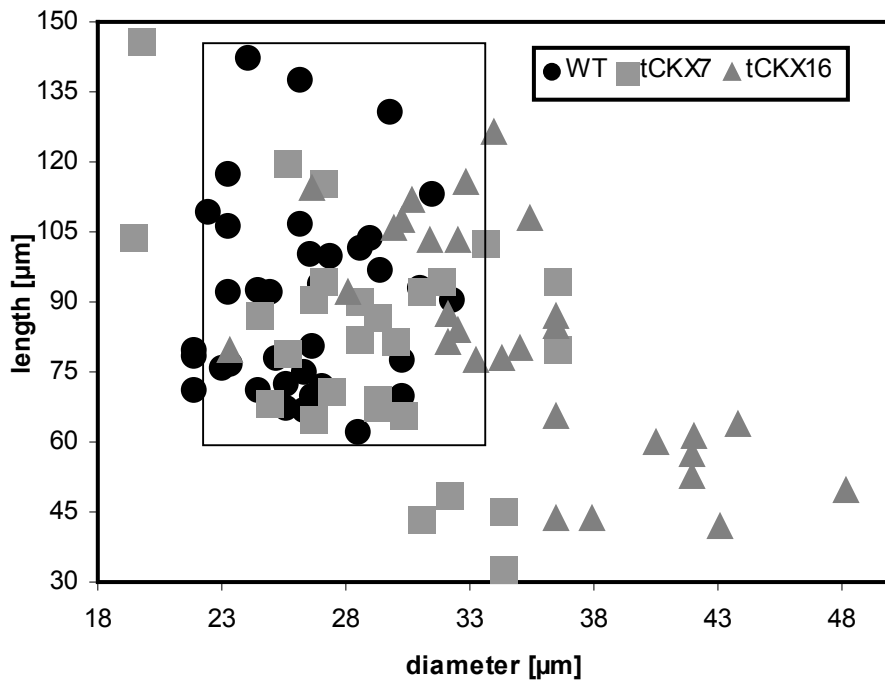

**Figure S2.** Cell dimensions of chloronema tissues of wild type (WT) *Physcomitrella patens* and the CKX transgenic lines tCKX7 and tCKX16, which form cells with increased diameters. The box indicates the ranges of dimensions obtained for WT cells.
