# Supplementary material
Source: PubMed Central journal article supplement (PMC2048801)
Supplement: plntphys_pp.107.103176_6.pdf [file plntphys_pp.107.103176_6.pdf]

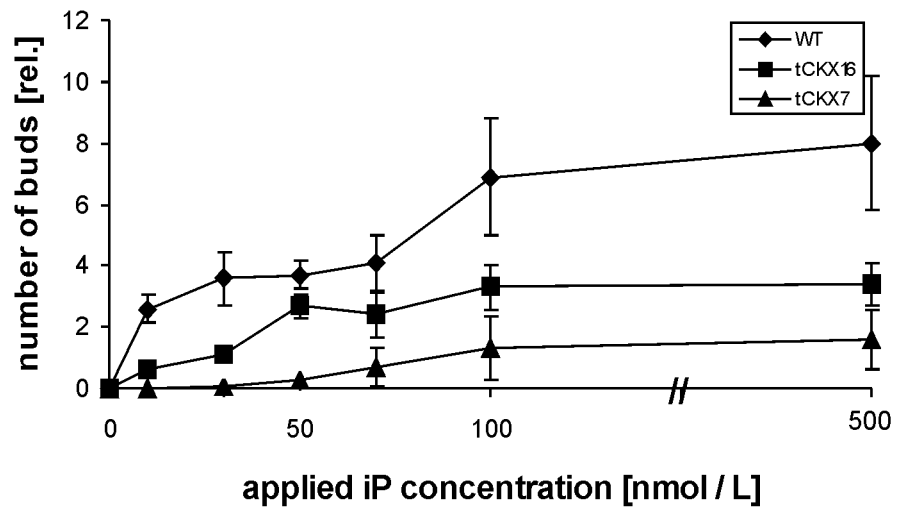

**Figure S3.** Budding responses recorded six days after adding iP to the agar culture medium of wild type *Physcomitrella patens* and the CKX transformants tCKX7 and tCKX16. Mean values with standard errors for number of buds counted in 12 microscopic fields are presented.
