# Supplementary material
Source: PubMed Central journal article supplement (PMC2048801)
Supplement: plntphys_pp.107.103176_7.pdf [file plntphys_pp.107.103176_7.pdf]

## Abbreviations of detected cytokinins

|        |                                                                 |
|--------|-----------------------------------------------------------------|
| BA     | <i>N</i> 6-benzyladenine                                        |
| BAR    | <i>N</i> 6-benzyladenosine                                      |
| cZ     | <i>cis</i> -zeatin                                              |
| cZR    | <i>cis</i> -zeatinriboside                                      |
| cZRMP  | <i>cis</i> -zeatin-riboside-5'-monophosphate                    |
| cZOG   | <i>cis</i> -zeatin-O-glucoside                                  |
| cZROG  | <i>cis</i> -zeatin-riboside-O-glucoside                         |
| DHZ    | dihydrozeatin                                                   |
| DHZR   | dihydrozeatinriboside                                           |
| DHZROG | dihydrozeatinriboside-O-glucoside                               |
| iP     | <i>N</i> 6-( $\Delta^2$ -isopentenyl)adenine                    |
| iPR    | <i>N</i> 6-( $\Delta^2$ -isopentenyl)adenosine                  |
| iPRMP  | <i>N</i> 6-( $\Delta^2$ -isopentenyl)adenosine-5'-monophosphate |
| mT,    | <i>meta</i> -topolin                                            |
| oT     | <i>ortho</i> -topolin                                           |
| tZ     | <i>trans</i> -zeatin                                            |
| tZR    | <i>trans</i> -zeatinriboside                                    |
| tZRMP  | <i>trans</i> -zeatin-riboside-5'-monophosphate                  |
| tZOG   | <i>trans</i> -zeatin-O-glucoside                                |
| tZROG  | <i>trans</i> -zeatinriboside-O-glucoside                        |
